# Supplementary material for: Design and synthesis of Janus-structured mutually doped SnO2–Co3O4hollow nanostructures as superior anode materials for lithium-ion batteries
Source: Royal Society of Chemistry journal article supplement (doi:10.1039/c7ta08335a), 2017-01-01
Supplement: c7ta08335a1.pdf [file c7ta08335a1.pdf]

## SUPPLEMENTARY INFORMATION

### **Design and synthesis of Janus-structured mutually-doped SnO<sub>2</sub>- Co<sub>3</sub>O<sub>4</sub> hollow nanostructures as superior anode materials for lithium-ion batteries**

Gi Dae Park<sup>a</sup>, Jung-Kul Lee<sup>\*b</sup> and Yun Chan Kang<sup>\*a</sup>

<sup>a</sup>Department of Materials Science and Engineering, Korea University, Anam-dong,  
Seongbuk-gu, Seoul 136-713, Republic of Korea

E-mail: [yckang@korea.ac.kr](mailto:yckang@korea.ac.kr) Fax: +82-2-928-3584

<sup>b</sup>Department of Chemical Engineering, Konkuk University, Hwayang-dong, Gwangjin-gu

Seoul 143-701, Republic of Korea, E-mail: [jkrhee@konkuk.ac.kr](mailto:jkrhee@konkuk.ac.kr)

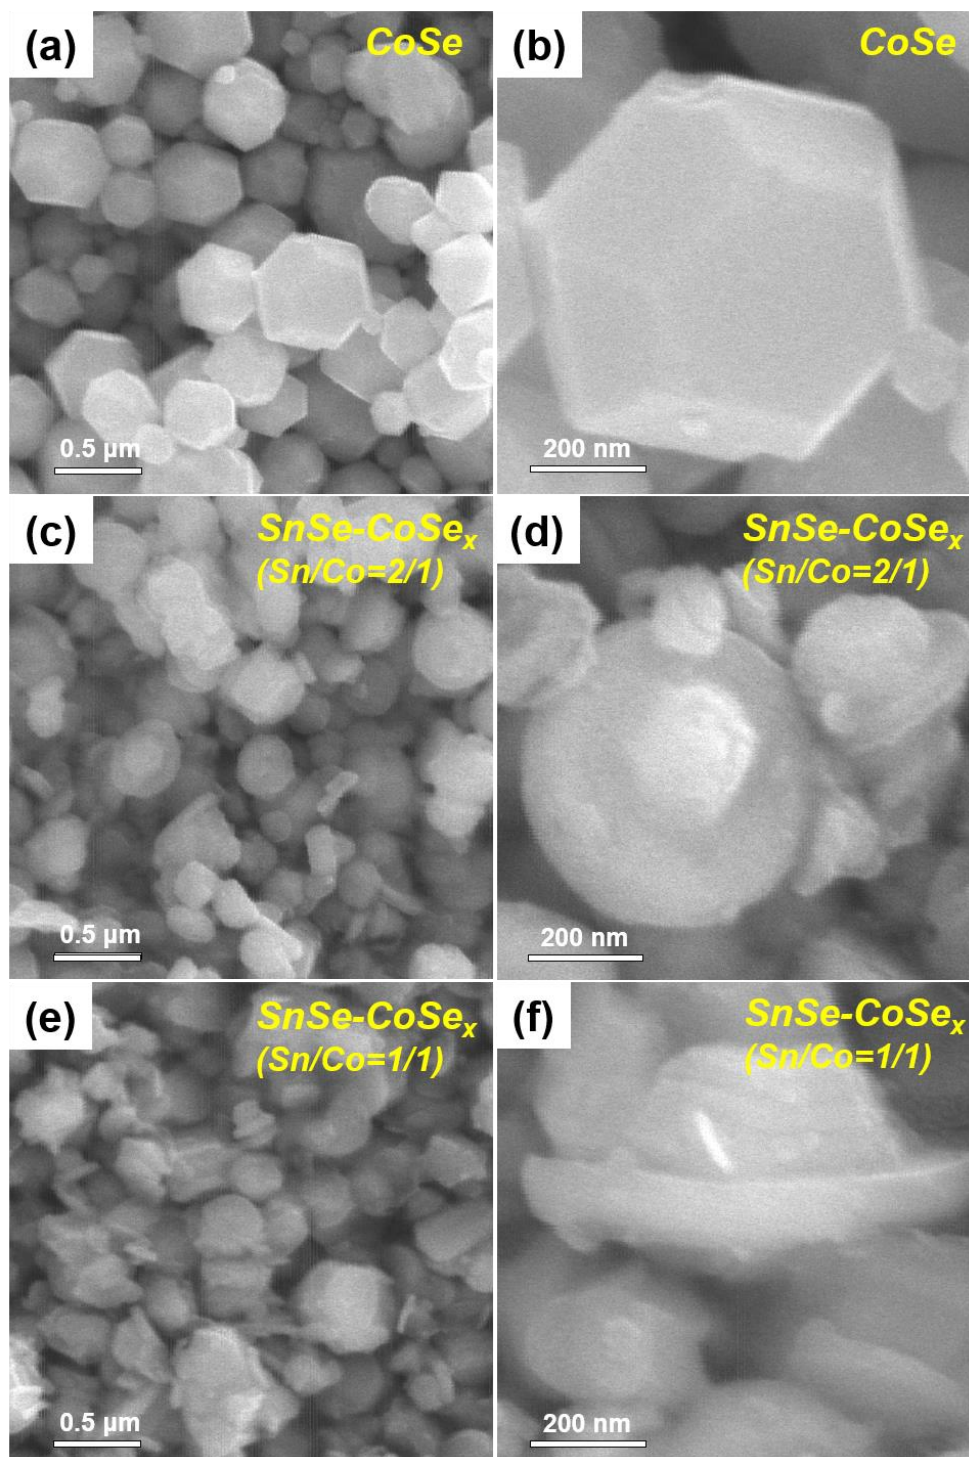

**Fig. S1** Morphologies of the CoSe<sub>2</sub> and Janus-structured mutually-doped SnSe-CoSe<sub>x</sub> powders doped with each other material prepared by one-pot spray pyrolysis: (a,b) CoSe, (c,d) Sn/Co = 2/1, and (e,f) Sn/Co = 1/1.

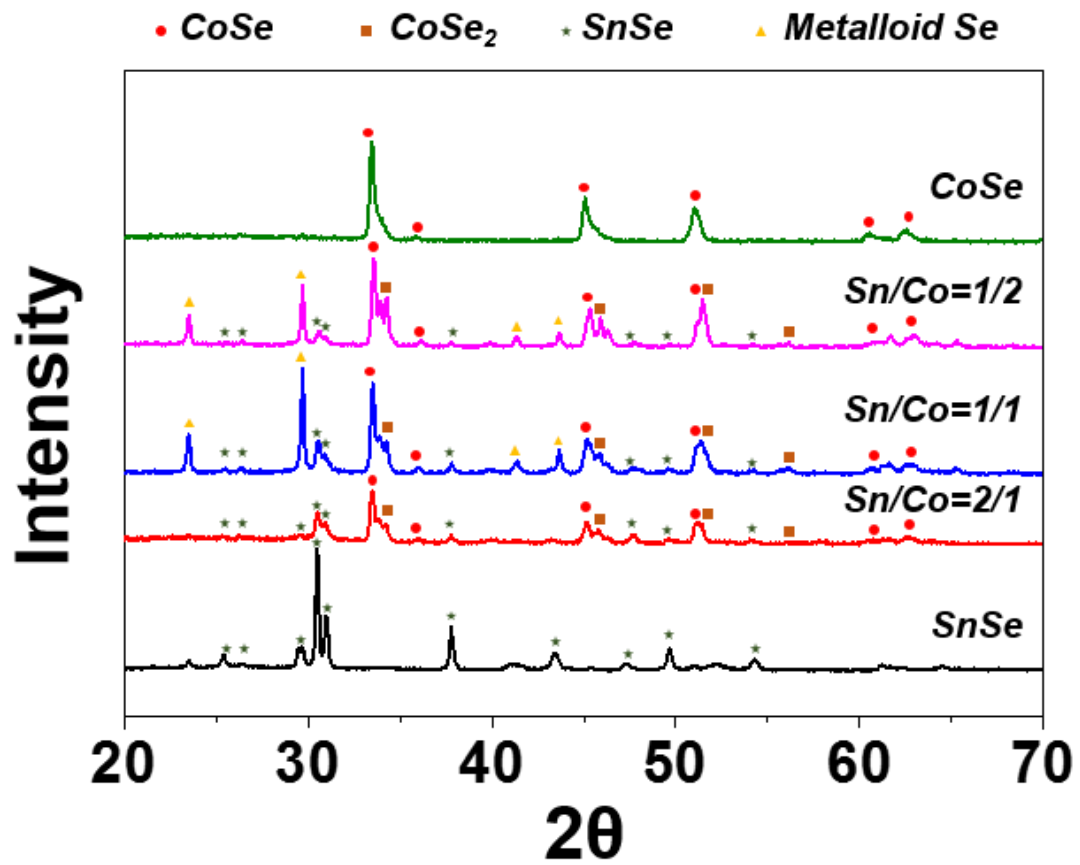

**Fig. S2** XRD patterns of the SnSe, CoSe<sub>x</sub> and Janus-structured mutually-doped SnSe-CoSe<sub>x</sub> powders prepared by one-pot spray pyrolysis.

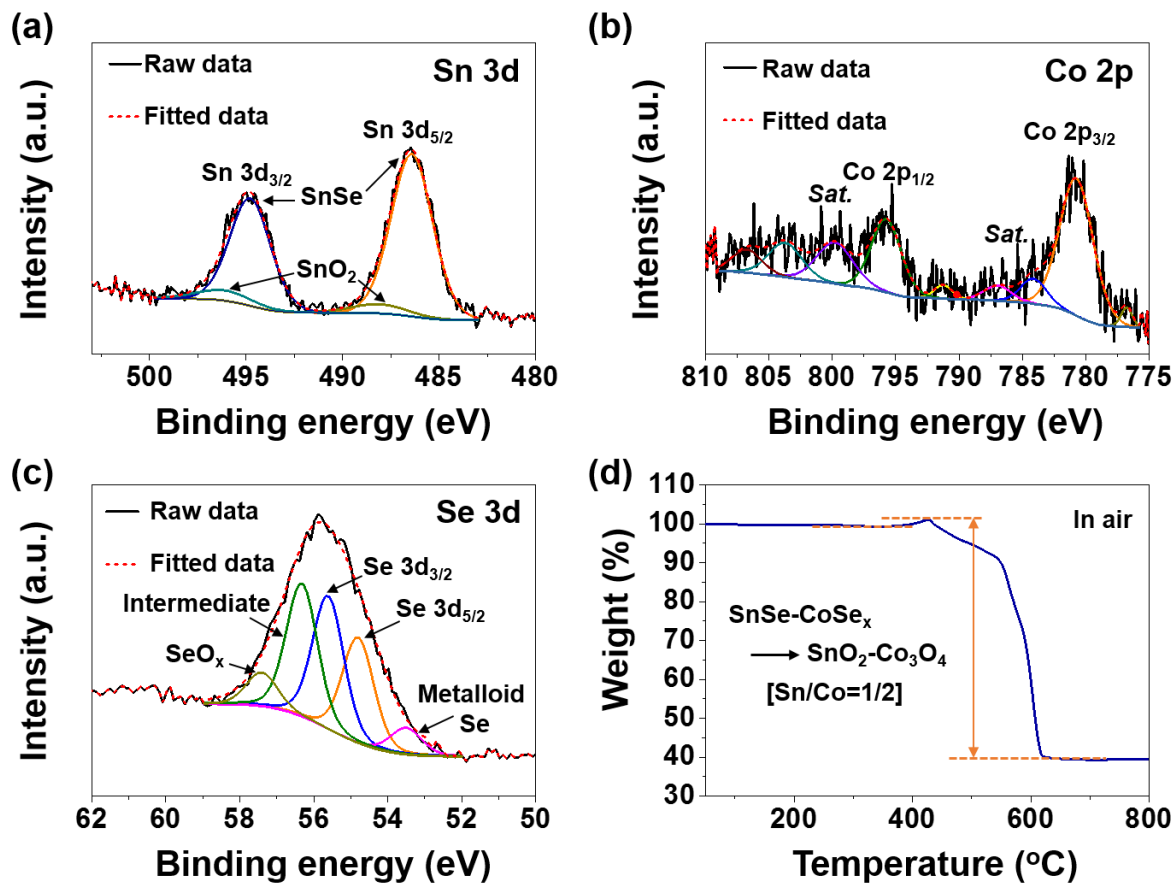

**Fig. S3** (a-c) XPS spectra and (d) TG curve of the Janus-structured mutually-doped SnSe-CoSe<sub>x</sub> powders with Sn/Co ratio of 1/2 formed by one-pot spray pyrolysis: (a) Sn, (b) Co, (c) Se, and (d) TG curve.

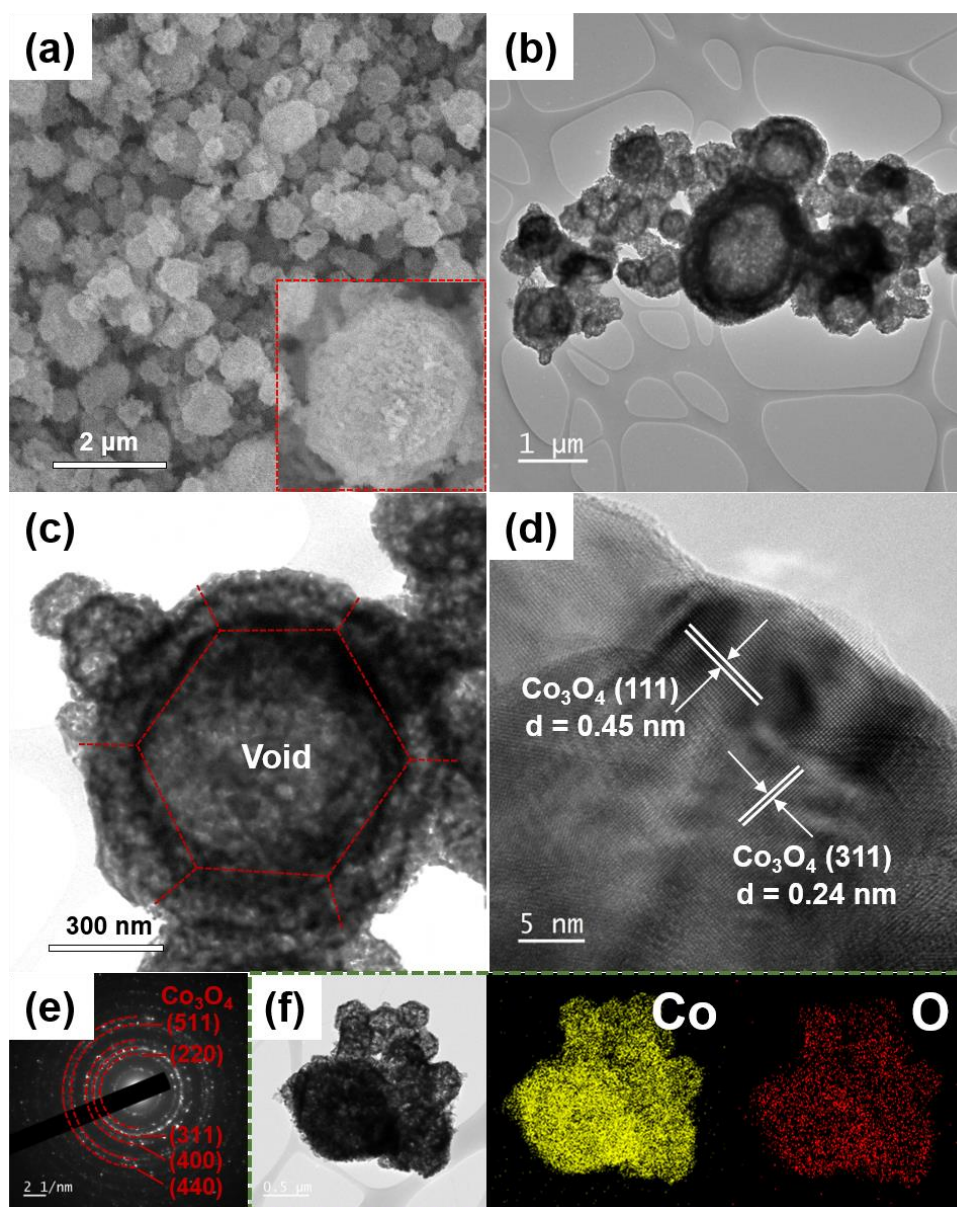

**Fig. S4** Morphologies of the  $\text{Co}_3\text{O}_4$  hollow polyhedron formed by nanoscale Kirkendall diffusion process: (a) SEM, (b,c) TEM, (d) high-resolution TEM images, (e) SAED pattern, and (f) elemental mapping images.

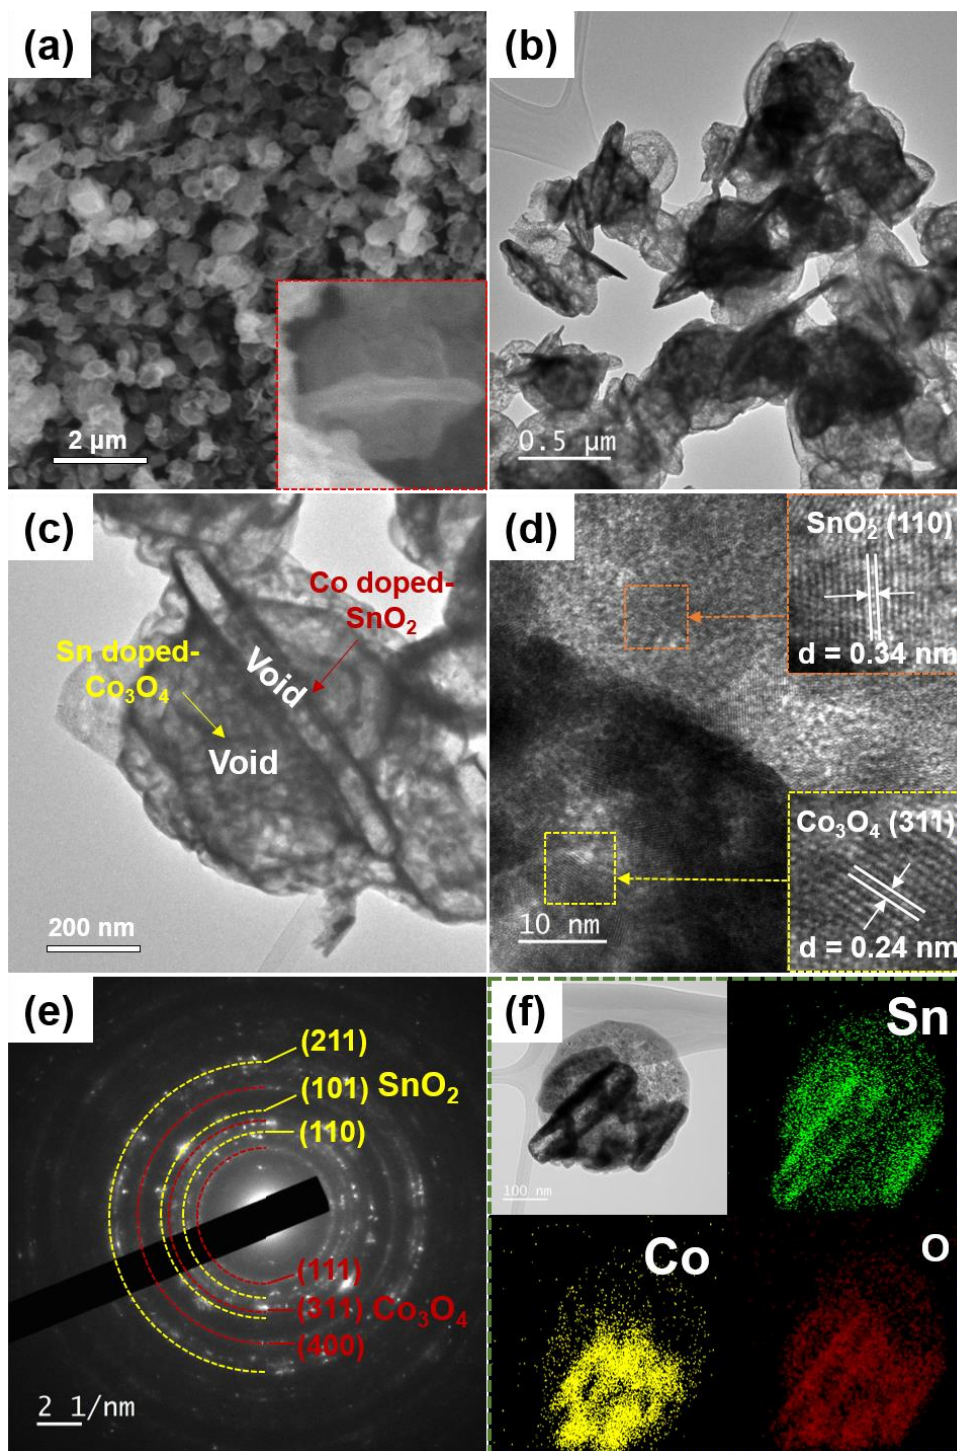

**Fig. S5** Morphologies of the Janus-structured mutually-doped  $\text{SnO}_2\text{-Co}_3\text{O}_4$  powders with Sn/Co ratio of 1/1 formed by nanoscale Kirkendall diffusion process: (a) SEM, (b,c) TEM, (d) high-resolution TEM images, (e) SAED pattern, and (f) elemental mapping images.

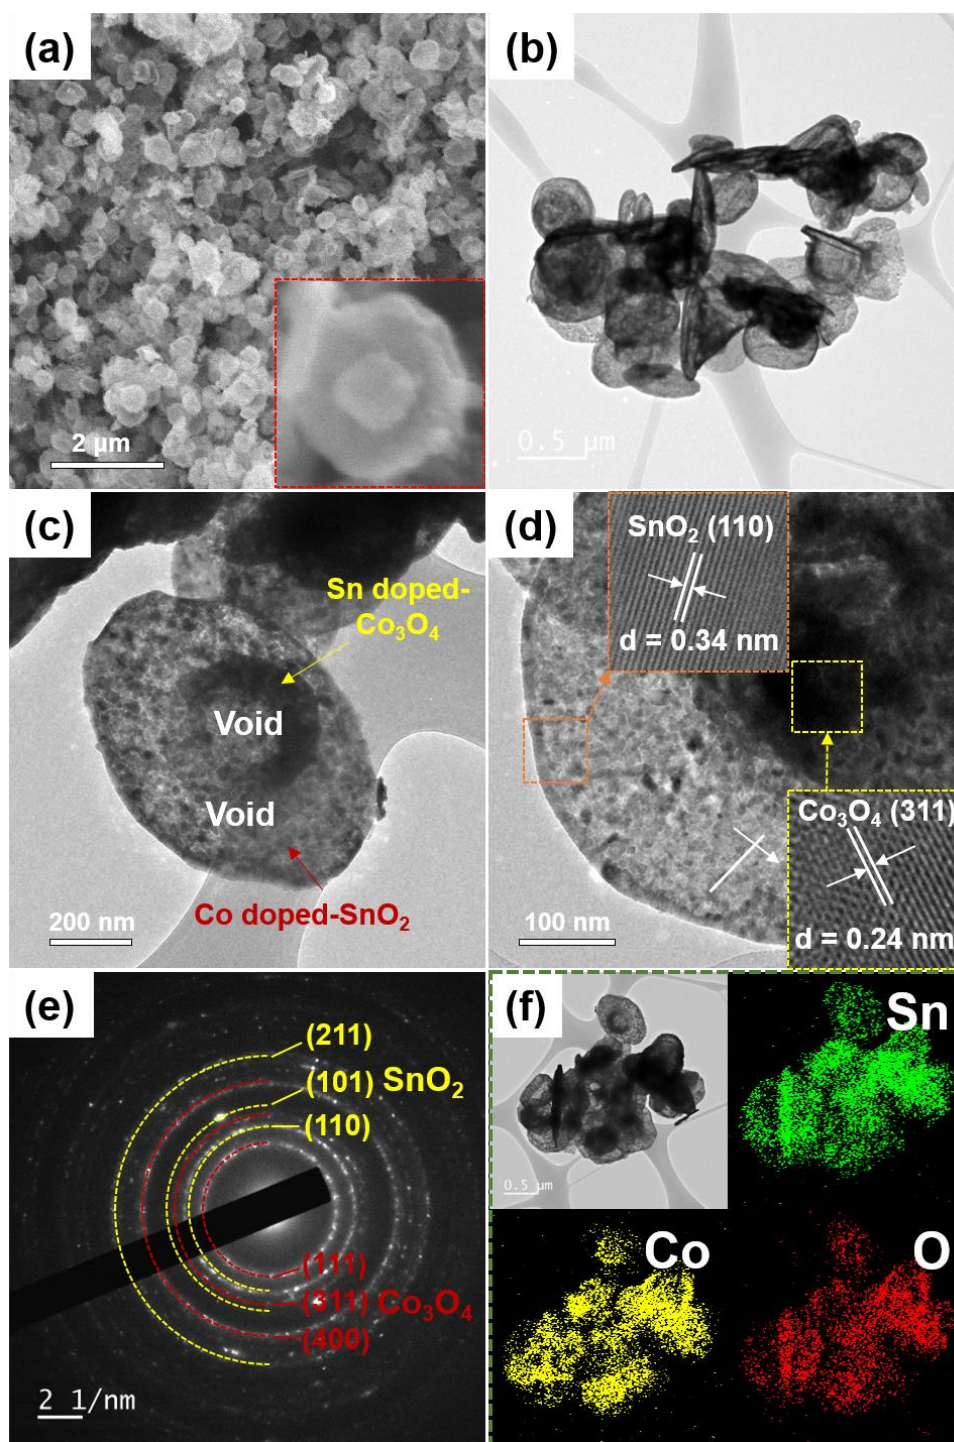

**Fig. S6** Morphologies of the Janus-structured mutually-doped  $\text{SnO}_2\text{-Co}_3\text{O}_4$  powders with Sn/Co ratio of 2/1 formed by nanoscale Kirkendall diffusion process: (a) SEM, (b,c) TEM, (d) high-resolution TEM images, (e) SAED pattern, and (f) elemental mapping images.

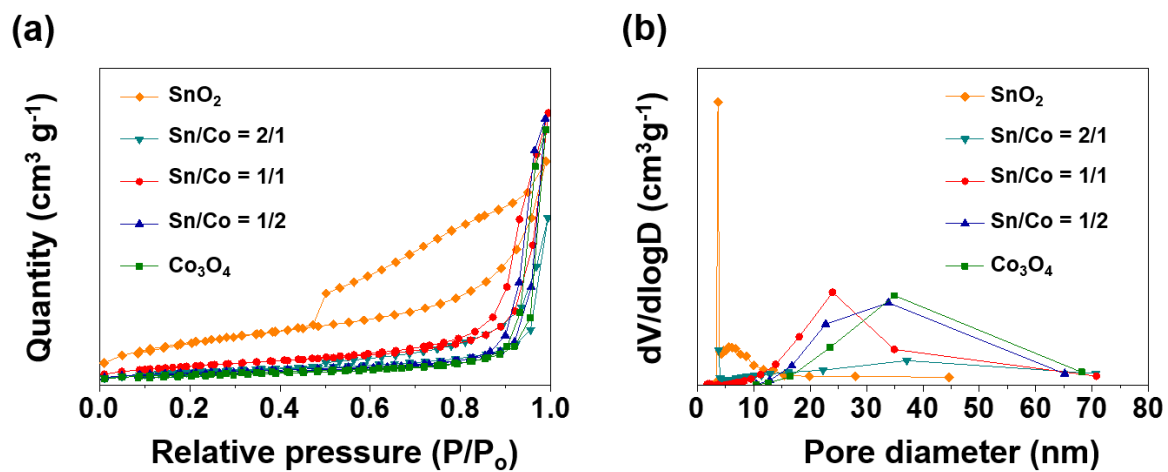

**Fig. S7** N<sub>2</sub> adsorption and desorption isotherms and BJH pore size distributions of the SnO<sub>2</sub>, Co<sub>3</sub>O<sub>4</sub>, and Janus-structured mutually-doped SnO<sub>2</sub>-Co<sub>3</sub>O<sub>4</sub> powders formed by nanoscale Kirkendall diffusion process.



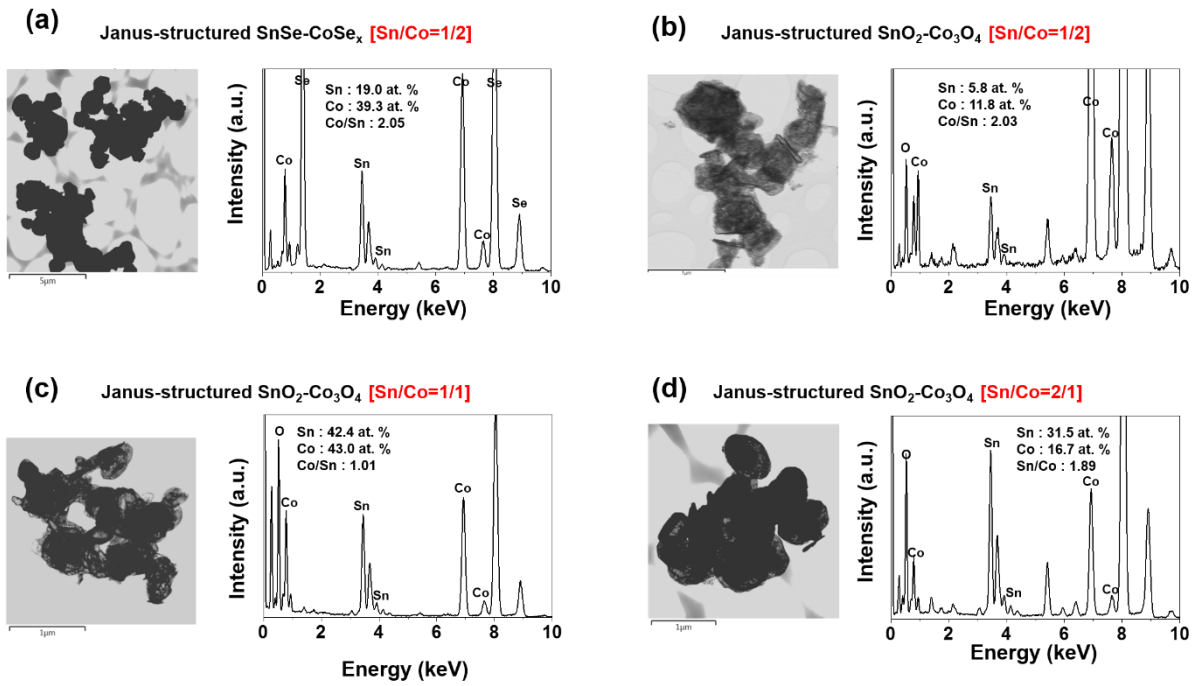

**Fig. S8** EDS data of Janus-structured SnSe-CoSe<sub>x</sub> (Sn/Co=1/2) and SnO<sub>2</sub>-Co<sub>3</sub>O<sub>4</sub> (Sn/Co=1/2,1/1, 2/1) powders.

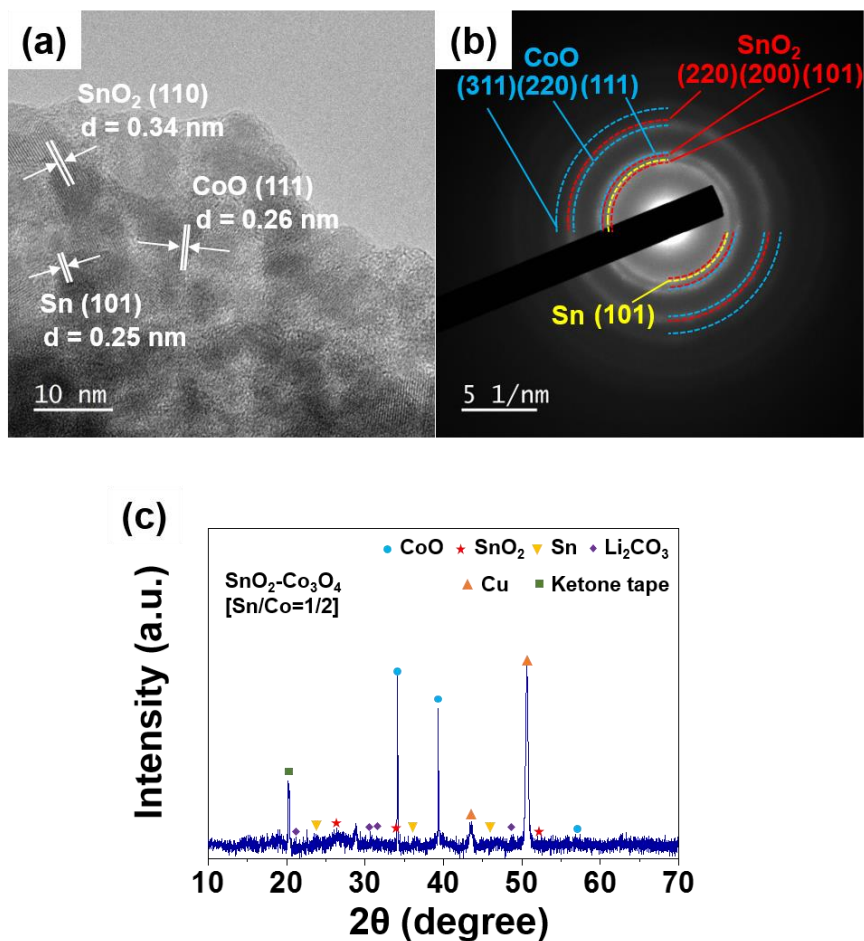

**Fig. S9** Characteristics of Janus-structured SnO<sub>2</sub>-Co<sub>3</sub>O<sub>4</sub> powders (Sn/Co=1/2) obtained after 50<sup>th</sup> charge process at a current density of 1 A g<sup>-1</sup>: (a) high resolution TEM image, (b) SAED pattern, and (c) XRD pattern.

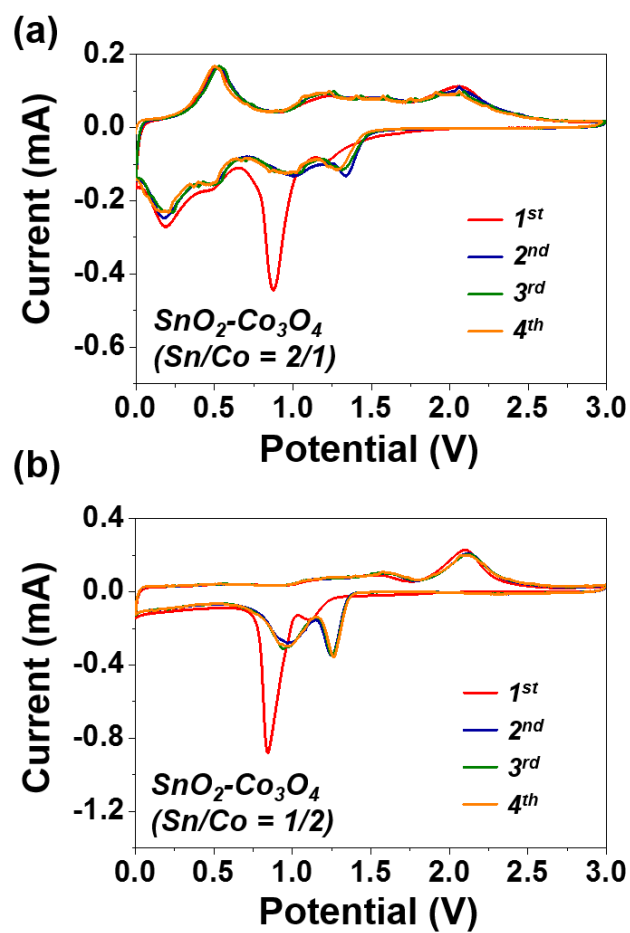

**Fig. S10** CV curves of the Janus-structured mutually-doped  $\text{SnO}_2\text{-Co}_3\text{O}_4$  powders formed by nanoscale Kirkendall diffusion process: (a)  $\text{SnO}_2\text{-Co}_3\text{O}_4$  ( $\text{Sn/Co} = 2/1$ ), (b)  $\text{SnO}_2\text{-Co}_3\text{O}_4$  ( $\text{Sn/Co} = 1/2$ ).

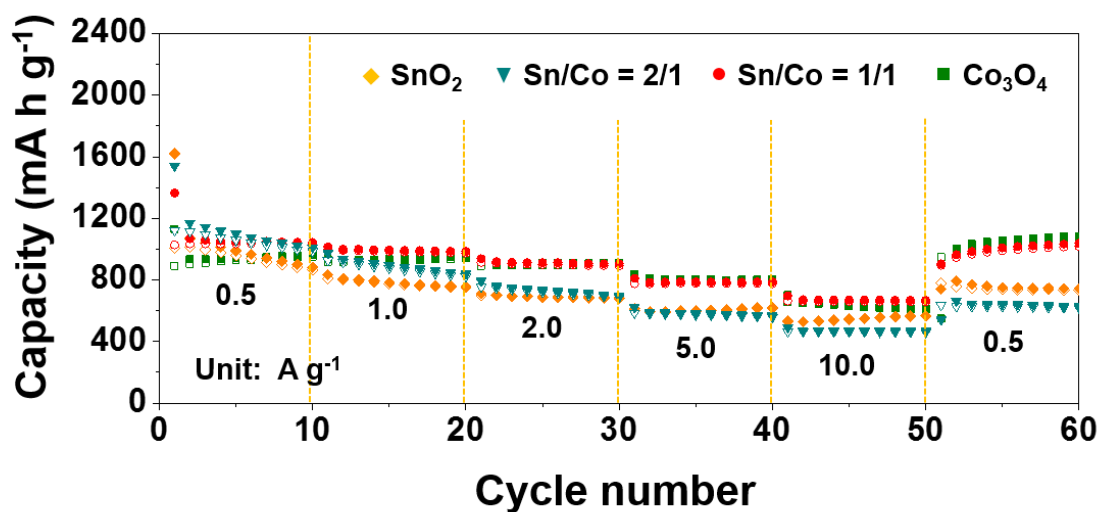

**Fig. S11** Rate performances of the SnO<sub>2</sub>, Co<sub>3</sub>O<sub>4</sub>, and Janus-structured mutually-doped SnO<sub>2</sub>-Co<sub>3</sub>O<sub>4</sub> powders formed by nanoscale Kirkendall diffusion process.

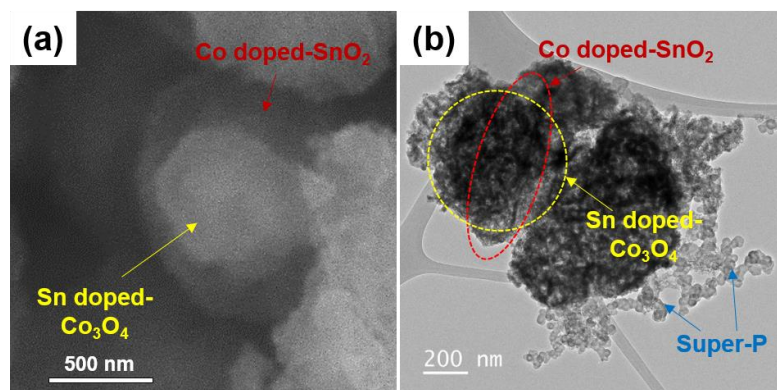

**Fig. S12** Morphologies of Janus-structured  $\text{SnO}_2\text{-Co}_3\text{O}_4$  powders ( $\text{Sn}/\text{Co}=1/2$ ) obtained after 50 cycles at a current density of  $1 \text{ A g}^{-1}$ : (a) SEM, (b) TEM images.

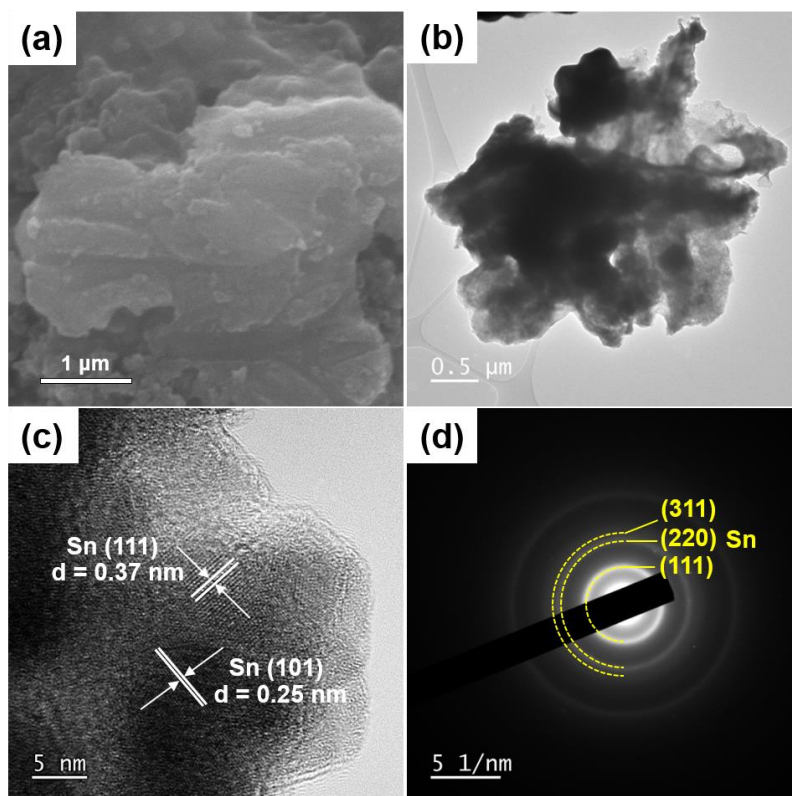

**Fig. S13** Morphologies of bare SnO<sub>2</sub> nanoplates obtained after 50 cycles at a current density of 1 A g<sup>-1</sup>: (a) SEM, (b) TEM image, (c) high resolution TEM image, and (d) SAED pattern.

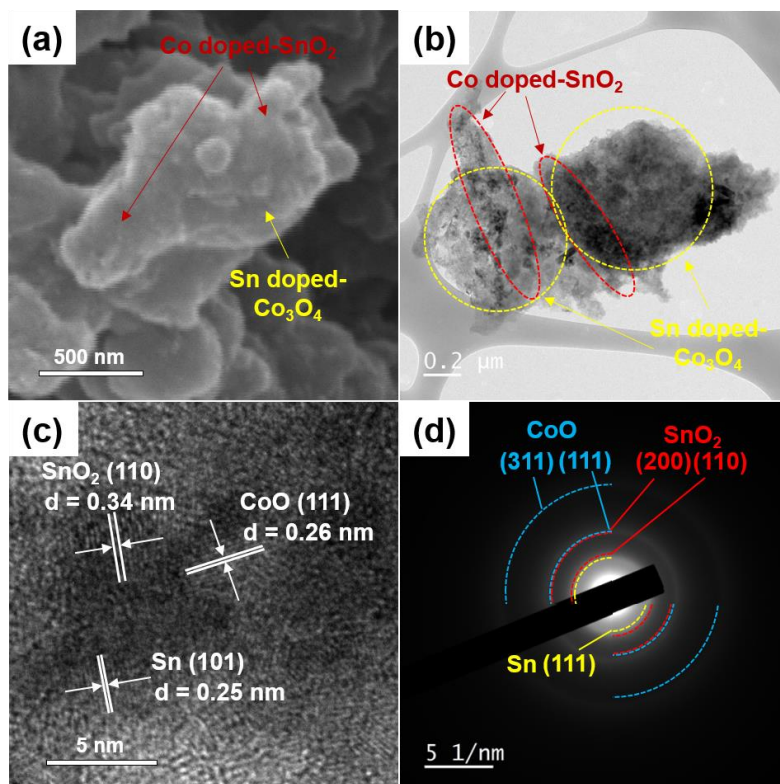

**Fig. S14** Morphologies of Janus-structured  $\text{SnO}_2\text{-Co}_3\text{O}_4$  powders ( $\text{Sn/Co}=1/2$ ) obtained after 1000 cycles at a current density of  $1 \text{ A g}^{-1}$ : (a) SEM, (b) TEM image, (c) high resolution TEM image, and (d) SAED pattern.

**Table S1.** Electrochemical properties of various nanostructured SnO<sub>2</sub>, Co<sub>3</sub>O<sub>4</sub> and SnO<sub>2</sub>-Co<sub>3</sub>O<sub>4</sub> materials applied as lithium-ion batteries reported in the previous literatures.

| Materials                                                                         | Voltage range (V) | Current rate            | Discharge capacity [mA h g <sup>-1</sup> ] and (cycle number) | Rate capacity [mA h g <sup>-1</sup> ] (current rate) | Ref  |
|-----------------------------------------------------------------------------------|-------------------|-------------------------|---------------------------------------------------------------|------------------------------------------------------|------|
| Interconnected SnO <sub>2</sub> nanoparticles                                     | 0.01-1.5          | 0.39 A g <sup>-1</sup>  | 564 (100)                                                     | 290 (4.7 A g <sup>-1</sup> )                         | [1]  |
| SnO <sub>2</sub> hollow nanoplates                                                | 0.001-3.0         | 1.0 A g <sup>-1</sup>   | 635 (300)                                                     | 267 (30.0 A g <sup>-1</sup> )                        | [2]  |
| Hierarchically structured SnO <sub>2</sub> microspheres                           | 0.001-3.0         | 1.0 A g <sup>-1</sup>   | 538 (300)                                                     | 158 (30.0 A g <sup>-1</sup> )                        | [3]  |
| Amorphous SnO <sub>2</sub> nanomembrane                                           | 0.003-3.0         | 1.6 A g <sup>-1</sup>   | 854 (1000)                                                    | 149 (40.0 A g <sup>-1</sup> )                        | [4]  |
| Mesoporous SnO <sub>2</sub> nanowire                                              | 0-1.2             | 0.4 A g <sup>-1</sup>   | 773 (50)                                                      | 250 (20.0 A g <sup>-1</sup> )                        | [5]  |
| Hierarchical SnO <sub>2</sub> hollow nanostructures                               | 0.05-2.0          | 0.1 A g <sup>-1</sup>   | 540 (50)                                                      | 460 (7.8 A g <sup>-1</sup> )                         | [6]  |
| SnO <sub>2</sub> hollow nanospheres                                               | 0.001-1.0         | 2.0 A g <sup>-1</sup>   | 643 (300)                                                     | 597 (7.0 A g <sup>-1</sup> )                         | [7]  |
| Porous structured SnO <sub>2</sub>                                                | 0.01-3.0          | 0.1 A g <sup>-1</sup>   | 645 (50)                                                      | 370 (5.0 A g <sup>-1</sup> )                         | [8]  |
| Mesoporous Co <sub>3</sub> O <sub>4</sub> nanowire arrays                         | 0.01-3.0          | 0.078 A g <sup>-1</sup> | 700 (20)                                                      | 450 (15.6 A g <sup>-1</sup> )                        | [9]  |
| Co <sub>3</sub> O <sub>4</sub> nanosheet-assembled multishelled hollow spheres    | 0.01-3.0          | 0.45 A g <sup>-1</sup>  | 866 (50)                                                      | 500 (1.78 A g <sup>-1</sup> )                        | [10] |
| Hollow-structured Co <sub>3</sub> O <sub>4</sub> nanoparticles                    | 0.05-3.0          | 0.45 A g <sup>-1</sup>  | 880 (50)                                                      | 450 (2.0 A g <sup>-1</sup> )                         | [11] |
| Micro-/nanostructured Co <sub>3</sub> O <sub>4</sub> cubes                        | 0.01-3.0          | 0.89 A g <sup>-1</sup>  | 980 (60)                                                      | 130 (8.9 A g <sup>-1</sup> )                         | [12] |
| Mesoporous Co <sub>3</sub> O <sub>4</sub> nanoflakes                              | 0.01-3.0          | 0.89 A g <sup>-1</sup>  | 883 (300)                                                     | 285 (8.9 A g <sup>-1</sup> )                         | [13] |
| Mesoporous single-crystalline Co <sub>3</sub> O <sub>4</sub> nanobelts            | 0-3.0             | 1.0 A g <sup>-1</sup>   | 980 (60)                                                      | 605 (3.0 A g <sup>-1</sup> )                         | [14] |
| Co <sub>3</sub> O <sub>4</sub> nanocages                                          | 0.05-3.0          | 0.05 A g <sup>-1</sup>  | 854 (30)                                                      | 252 (2.0 A g <sup>-1</sup> )                         | [15] |
| Co <sub>3</sub> O <sub>4</sub> nanoparticle decorated ultrathin porous nanosheets | 0.01-3.0          | 0.18 A g <sup>-1</sup>  | 888.8 (80)                                                    | 22.2 (4.5 A g <sup>-1</sup> )                        | [16] |
| SnO <sub>2</sub> @Co <sub>3</sub> O <sub>4</sub> hollow nanospheres               | 0.01-2.5          | 0.1 A g <sup>-1</sup>   | 982 (100)                                                     | 750 (0.9 A g <sup>-1</sup> )                         | [17] |
| Hollow SnO <sub>2</sub> @Co <sub>3</sub> O <sub>4</sub> core shell spheres        | 0.05-3.0          | 0.2 A g <sup>-1</sup>   | 815 (100)                                                     | 380 (1.0 A g <sup>-1</sup> )                         | [18] |



|                                                                                           |                  |                             |                      |                                      |                 |
|-------------------------------------------------------------------------------------------|------------------|-----------------------------|----------------------|--------------------------------------|-----------------|
| SnO <sub>2</sub> -Co <sub>3</sub> O <sub>4</sub> core-shell nanoneedle arrays             | 0.001-3.0        | 0.5 A g <sup>-1</sup>       | 985 (100)            | 219 (12.0 A g <sup>-1</sup> )        | [19]            |
| <b>Janus-structured mutually doped hollow SnO<sub>2</sub>-Co<sub>3</sub>O<sub>4</sub></b> | <b>0.001-3.0</b> | <b>1.0 A g<sup>-1</sup></b> | <b>1058.7 (1000)</b> | <b>666.3 (10.0 A g<sup>-1</sup>)</b> | <b>Our work</b> |

## References

- [1] V. Etacheri, G. A. Seisenbaeva, J. Caruthers, G. Daniel, J.-M. Nedelec, V. G. Kessler, V. G. Pol, *Adv. Energy Mater.*, 2015, **5**, 1401289.
- [2] G. D. Park, J.-K. Lee, Y. C. Kang, *Adv. Funct. Mater.*, 2017, **27**, 1603399.
- [3] G. D. Park, Y. C. Kang, *Nano Res.*, 2017, DOI 10.1007/s12274-017-1744-7.
- [4] X. Liu, J. Zhang, W. Si, L. Xi, S. Oswald, C. Yan, O. G. Schmidt, *Nanoscale*, 2015, **7**, 282-288.
- [5] H. Kim, J. Cho, *J. Mater. Chem.*, 2008, **18**, 771-775.
- [6] X. M. Yin, C. C. Li, M. Zhang, Q. Y. Hao, S. Liu, L. B. Chen, T. H. Wang, *J. Phys. Chem. C*, 2010, **114**, 8084-8088.
- [7] J. S. Cho, H. S. Ju, Y. C. Kang, *Sci. Rep.*, 2016, **6**, 23915.
- [8] T. Yang, B. Lu, *Phys. Chem. Chem. Phys.*, 2014, **16**, 4115-4121.
- [9] Y. Li, B. Tan, Y. Wu, *Nano Lett.*, 2008, **8**, 265-270.
- [10] X. Wang, X.-L. Wu, Y.-G. Guo, Y. Zhong, X. Cao, Y. Ma, J. Yao, *Adv. Funct. Mater.*, 2010, **20**, 1680-1686.
- [11] D. Wang, Y. Yu, H. He, J. Wang, W. Zhou, H. D. Abruna, *ACS Nano*, 2015, **9**, 1775-1781.
- [12] G. Huang, S. Xu, S. Lu, L. Li, H. Sun, *ACS Appl. Mater. Interfaces*, 2014, **6**, 7236-7243.
- [13] S. Chen, Y. Zhao, B. Sun, Z. Ao, X. Xie, Y. Wei, G. Wang, *ACS Appl. Mater. Interfaces*, 2015, **7**, 3306-3313.
- [14] H. Huang, W. Zhu, X. Tao, Y. Xia, Z. Yu, J. Fang, Y. Gan, W. Zhang, *ACS Appl. Mater. Interfaces.*, 2012, **4**, 5974-5980.
- [15] N. Yan, L. Hu, Y. Li, Y. Wang, H. Zhong, X. Hu, X. Kong, Q. Chen, *J. Phys. Chem. C*, 2012, **116**, 7227-7235.
- [16] J. Mujtaba, H. Sun, G. Huang, K. Møhlhave, Y. Liu, Y. Zhao, X. Wang, S. Xu, J. Zhu, *Sci. Rep.*, 2016, **6**, 20592.
- [17] W. S. Kim, Y. Hwa, H.-C. Kim, J.-H. Choi, H.-J. Sohn, S.-H. Hong, *Nano Res.*, 2014, **8**, 1128-1136.

- [18] B. Zhao, S.-Y. Huang, T. Wang, K. Zhang, M. M. F. Yuen, J.-B. Xu, X.-Z. Fu, R. Sun, C.-P. Wong, *J. Power Sources*, 2015, **298**, 83-91.
- [19] L.-L. Xing, Y.-Y. Zhao, J. Zhao, Y.-X. Nie, P. Deng, Q. Wang, X.-Y. Xue, *J. Alloys Compd.*, 2014, **586**, 28-33.
